# Supplementary material
Source: Research Square preprint supplement (doi:10.21203/rs.3.rs-9383716/v1)
Supplement: Supplementary file 1 [file 7dea21f330befb1a1af3efd8.docx]

Supplementary Materials

Supplemental Table 1. Subgroup analyses of the association between headache and CircS by sex.

Supplemental Table 2. Subgroup analyses of the association between headache and CircS by age.

Supplemental Table 3. Multivariate logistic regression analysis between CircS components and headache.

Supplementary figure 1. Simple diagram of the cross-lagged path analysis model; 2011 represents the baseline period and 2015 represents the follow-up period. Note: Circs, circadian syndrome.

**Supplemental Table 1.** Subgroup analyses of the association between headache and CircS by sex.

| **Cohort** | **Subgroup** | **Group** | **Model** | **OR** | **95% CI** | ***P*** |
| --- | --- | --- | --- | --- | --- | --- |
| Headache → CircS | Gender | Male | Model 1 | 1.93 | 1.24-3.00 | 0.0034 |
| Headache → CircS | Gender | Male | Model 2 | 1.94 | 1.25-3.01 | 0.0031 |
| Headache → CircS | Gender | Male | Model 3 | 2.36 | 1.43-3.89 | 0.0007 |
| Headache → CircS | Gender | Female | Model 1 | 0.96 | 0.73-1.27 | 0.7864 |
| Headache → CircS | Gender | Female | Model 2 | 0.96 | 0.73-1.27 | 0.7857 |
| Headache → CircS | Gender | Female | Model 3 | 1.03 | 0.75-1.42 | 0.835 |
| CircS → Headache | Gender | Male | Model 1 | 1.49 | 1.12-1.98 | 0.0055 |
| CircS → Headache | Gender | Male | Model 2 | 1.48 | 1.12-1.96 | 0.0064 |
| CircS → Headache | Gender | Male | Model 3 | 1.65 | 1.20-2.27 | 0.0019 |
| CircS → Headache | Gender | Female | Model 1 | 1.52 | 1.27-1.83 | < 0.001 |
| CircS → Headache | Gender | Female | Model 2 | 1.51 | 1.25-1.82 | < 0.001 |
| CircS → Headache | Gender | Female | Model 3 | 1.54 | 1.26-1.88 | < 0.001 |

Model 1 was the unadjusted model; Model 2 was adjusted for sex and age; Model 3 was additionally adjusted for education, marital status, residence, BMI, annual household income, smoking, drinking, physical activity, cancer, stroke, and heart disease. CircS: circadian syndrome; OR: odds ratio; 95% CI: 95% confidence interval.

**Supplemental Table 2.** Subgroup analyses of the association between headache and CircS by age.

| **Cohort** | **Subgroup** | **Group** | **Model** | **OR** | **95% CI** | ***P*** |
| --- | --- | --- | --- | --- | --- | --- |
| Headache → CircS | Age | <60 | Model 1 | 1.49 | 1.11-1.98 | 0.0073 |
| Headache → CircS | Age | <60 | Model 2 | 1.26 | 0.94-1.68 | 0.1289 |
| Headache → CircS | Age | <60 | Model 3 | 1.52 | 1.09-2.12 | 0.0132 |
| Headache → CircS | Age | ≥60 | Model 1 | 1.18 | 0.79-1.78 | 0.419 |
| Headache → CircS | Age | ≥60 | Model 2 | 0.96 | 0.63-1.46 | 0.8541 |
| Headache → CircS | Age | ≥60 | Model 3 | 0.94 | 0.58-1.51 | 0.7841 |
| CircS → Headache | Age | <60 | Model 1 | 1.7 | 1.38-2.09 | < 0.001 |
| CircS → Headache | Age | <60 | Model 2 | 1.5 | 1.21-1.85 | 0.0002 |
| CircS → Headache | Age | <60 | Model 3 | 1.53 | 1.22-1.93 | 0.0003 |
| CircS → Headache | Age | ≥60 | Model 1 | 1.7 | 1.37-2.13 | < 0.001 |
| CircS → Headache | Age | ≥60 | Model 2 | 1.51 | 1.20-1.90 | 0.0004 |
| CircS → Headache | Age | ≥60 | Model 3 | 1.6 | 1.24-2.06 | 0.0003 |

Model 1 was the unadjusted model; Model 2 was adjusted for sex and age; Model 3 was additionally adjusted for education, marital status, residence, BMI, annual household income, smoking, drinking, physical activity, cancer, stroke, and heart disease. CircS: circadian syndrome; OR: odds ratio; 95% CI: 95% confidence interval.

**Supplemental Table 3.** Multivariate logistic regression analysis between CircS components and headache.

| **Model** | **Component** | **OR** | **95% CI** | **P** |
| --- | --- | --- | --- | --- |
| Model 1 | Abdominal obesity | 0.932 | 0.800-1.086 | 0.368 |
| Model 1 | Hypertriglyceridemia | 1.043 | 0.870-1.250 | 0.649 |
| Model 1 | Low HDL-C | 1.112 | 0.936-1.321 | 0.227 |
| Model 1 | Hypertension | 1.34 | 1.133-1.584 | <0.001 |
| Model 1 | Hyperglycemia | 1.109 | 0.954-1.288 | 0.178 |
| Model 1 | Short sleep | 1.278 | 1.087-1.502 | 0.003 |
| Model 1 | Depression | 2.952 | 2.550-3.417 | <0.001 |
| Model 2 | Abdominal obesity | 0.803 | 0.685-0.940 | 0.006 |
| Model 2 | Hypertriglyceridemia | 1.066 | 0.888-1.279 | 0.496 |
| Model 2 | Low HDL-C | 0.998 | 0.838-1.189 | 0.985 |
| Model 2 | Hypertension | 1.345 | 1.134-1.596 | <0.001 |
| Model 2 | Hyperglycemia | 1.133 | 0.973-1.319 | 0.108 |
| Model 2 | Short sleep | 1.238 | 1.051-1.458 | 0.01 |
| Model 2 | Depression | 2.748 | 2.371-3.185 | <0.001 |
| Model 3 | Abdominal obesity | 0.9 | 0.744-1.089 | 0.28 |
| Model 3 | Hypertriglyceridemia | 1.083 | 0.898-1.305 | 0.404 |
| Model 3 | Low HDL-C | 0.987 | 0.826-1.179 | 0.885 |
| Model 3 | Hypertension | 1.312 | 1.096-1.570 | 0.003 |
| Model 3 | Hyperglycemia | 1.141 | 0.979-1.329 | 0.092 |
| Model 3 | Short sleep | 1.187 | 1.006-1.399 | 0.042 |
| Model 3 | Depression | 2.491 | 2.142-2.896 | <0.001 |

Model 1 was the unadjusted model; Model 2 was adjusted for sex and age; Model 3 was additionally adjusted for education, marital status, residence, BMI, annual household income, smoking, drinking, physical activity, cancer, stroke, and heart disease. CircS: circadian syndrome; OR: odds ratio; 95% CI: 95% confidence interval; HDL-C: high-density lipoprotein cholesterol.

| **Supplemental Table 4.** Longitudinal association between headache and CircS | | | | |
| --- | --- | --- | --- | --- |
| **Model** | Headache(N = 8294) |  | CircS(N = 10201) |  |
|  | **OR (95% CI)** | ***p*** | **OR (95% CI)** | ***p*** |
| Model 1 | 1.39 (1.12-1.72) | 0.003 | 1.74 (1.52-1.99) | <0.001 |
| Model 2 | 1.18 (0.94-1.46) | 0.142 | 1.50 (1.31-1.72) | <0.001 |
| Model 3 | 1.13 (0.73-1.71) | 0.571 | 1.58 (1.23-2.01) | <0.001 |
| Data are presented as odds ratio (95% confidence interval). Model 1 was the unadjusted model; Model 2 was adjusted for sex and age; Model 3 was additionally adjusted for education, marital status, residence, BMI, annual household income, smoking, drinking, physical activity, cancer, stroke, and heart disease. CircS: circadian syndrome; OR: odds ratio; 95% CI: 95% confidence interval. | | | | |

Headache

(2011)

rl

CircS

(2011)

αl

β1

β2

α2

Headache

(2015)

CircS

(2015)

**Supplementary figure 1.** A simple schematic diagram of the cross-lagged path analysis model; 2011 represents the baseline period and 2015 represents the follow-up period. Note: Circs, circadian syndrome.

**ALL**


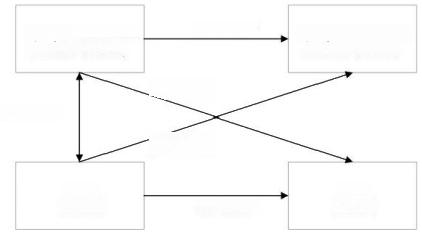


Symptomatic knee arthritis(2011)

r1=0.104*

CireS

(2011)

Symptomatic knee arthritis(2015)

CircS

(2015)

αl=0.321*

βl=0.047*

B2=0.066*

α2=0.439*

B **MALE** C FEMALE


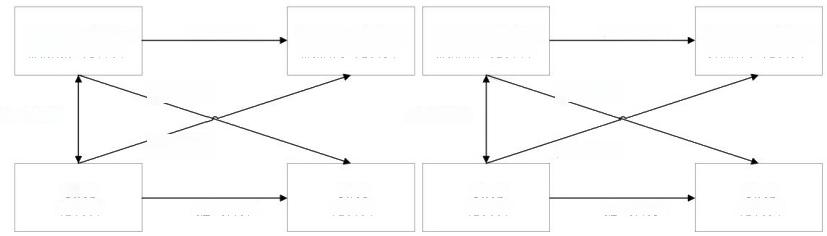


Symptomatic knee arthritis(2011)

βl=0.042*

r1=0.092*

B2=0.043*

CireS

(2011)

CircS CireS

(2015) (2011) α2=0.415*

β1=0.035*

β2=0.054*

Symptomatic knee arthritis(2011)

Symptomatic knee arthritis(2015)

Symptomatic knee arthritis(2015)

CireS

(2015)

α2=0.417*

α1=0.328*

αl=0.292*

rl=0.116*

Supplemental Figure 2.Cross-lagged path with statistical significance;*,P<0.01;

2011 represents baseline and 2015 represents follow-up.Notes,CircS,circadian

syndrome.
